# Supplementary material for: Drosophila as a Model for Intractable Epilepsy: Gilgamesh Suppresses Seizures in parabss1 Heterozygote Flies
Source: PubMed Central journal article supplement (PMC3737179; doi:10.1534/g3.113.006130), 2013-08-01
Supplement: supp_g3.113.006130_006130SI.pdf [file supp_g3.113.006130_006130SI.pdf]

***Drosophila* as a model for intractable epilepsy: *gilgamesh* suppresses seizures in *para*<sup>bss1</sup> heterozygote flies**

Iris C. Howlett<sup>\*</sup>, Zeid M. Rusan<sup>\*</sup>, Louise Parker<sup>\*\*</sup>, Mark A. Tanouye<sup>\*\*</sup>

<sup>\*</sup>Department of Molecular and Cell Biology  
University of California  
Berkeley, CA 94720

<sup>\*\*</sup>Department of Environmental Science, Policy and Management  
University of California  
Berkeley, CA 94720

**DOI: 10.1534/g3.113.006130**

File S1

Screen Data

| Stock<br>(Bloomington) | Chromosome | Df BS% | Bal BS% | Rec time Df | Rec time Bal | Difference |
|------------------------|------------|--------|---------|-------------|--------------|------------|
| 7532                   | 2          | 50     | 32      | 73          | 94           | 21         |
| 7533                   | 2          | 96     | 68      | 155         | 152          | -3         |
| 7534                   | 2          | 96     | 90      | 172         | 210          | 38         |
| 7535                   | 2          | 96     | 84      | 114         | 120          | 6          |
| 7536                   | 2          | 40     | 16      | 95          | 115          | 20         |
| 7537                   | 2          | 86     | 55      | 97          | 127          | 30         |
| 7538                   | 2          | 76     | 51      | 215         | 85           | -130       |
| 7539                   | 2          | 92     | 70      | 160         | 177          | 17         |
| 7540                   | 2          | 88     | 75      | 90          | 82           | -8         |
| 7541                   | 2          | 89     | 90      | 171         | 191          | 20         |
| 7543                   | 2          | 86     | 53      | 73          | 126          | 53         |
| 7544                   | 2          | 91     | 75      | 132         | 129          | -3         |
| 7545                   | 2          | 72     | 48      | 131         | 159          | 28         |
| 7546                   | 2          | 98     | 71      | 205         | 190          | -15        |
| 7547                   | 2          | 45     | 42      | 85          | 116          | 31         |
| 7548                   | 2          | 71     | 59      | 90          | 106          | 16         |
| 7549                   | 2          | 76     | 47      | 131         | 132          | 1          |
| 7551                   | 2          | 89     | 82      | 143         | 126          | -17        |
| 7553                   | 2          | 98     | 69      | 217         | 118          | -99        |
| 7554                   | 2          | 54     | 18      | 128         | 108          | -20        |
| 7556                   | 2          | 98     | 65      | 216         | 129          | -87        |
| 7557                   | 2          | 94     | 85      | 186         | 216          | 30         |
| 7558                   | 2          | 55     | 44      | 306         | 135          | -171       |
| 7559                   | 2          | 76     | 85      | 284         | 215          | -69        |
| 7561                   | 2          | 78     | 65      | 172         | 215          | 43         |
| 7748                   | 2          | 81     | 64      | 97          | 138          | 41         |
| 7749                   | 2          | 94     | 53      | 77          | 123          | 46         |
| 7750                   | 2          | 2      | 72      | 96          | 121          | 25         |
| 7858                   | 2          | 95     | 81      | 163         | 184          | 21         |

|      |   |    |    |     |     |      |
|------|---|----|----|-----|-----|------|
| 7859 | 2 | 84 | 45 | 232 | 102 | -130 |
| 7860 | 2 | 93 | 57 | 144 | 128 | -16  |
| 7862 | 2 | 88 | 73 | 119 | 157 | 38   |
| 7863 | 2 | 97 | 70 | 143 | 221 | 78   |
| 7864 | 2 | 89 | 68 | 131 | 139 | 8    |
| 7867 | 2 | 92 | 72 | 103 | 105 | 2    |
| 7869 | 2 | 94 | 75 | 120 | 157 | 37   |
| 7870 | 2 | 92 | 34 | 146 | 204 | 58   |
| 7871 | 2 | 91 | 81 | 145 | 190 | 45   |
| 7872 | 2 | 82 | 30 | 198 | 136 | -62  |
| 7873 | 2 | 92 | 95 | 142 | 214 | 72   |
| 7875 | 2 | 94 | 50 | 162 | 194 | 32   |
| 7876 | 2 | 94 | 44 | 106 | 111 | 5    |
| 7877 | 2 | 95 | 66 | 118 | 156 | 38   |
| 7879 | 2 | 86 | 47 | 264 | 164 | -100 |
| 7880 | 2 | 91 | 81 | 161 | 174 | 13   |
| 7881 | 2 | 68 | 47 | 99  | 115 | 16   |
| 7882 | 2 | 63 | 16 | 99  | 99  | 0    |
| 7883 | 2 | 79 | 32 | 111 | 101 | -10  |
| 7886 | 2 | 76 | 41 | 152 | 193 | 41   |
| 7887 | 2 | 86 | 51 | 114 | 99  | -15  |
| 7888 | 2 | 93 | 45 | 204 | 149 | -55  |
| 7890 | 2 | 75 | 6  | 118 | 120 | 2    |
| 7891 | 2 | 35 | 33 | 73  | 123 | 50   |
| 7893 | 2 | 94 | 73 | 144 | 161 | 17   |
| 7894 | 2 | 84 | 64 | 98  | 142 | 44   |
| 7895 | 2 | 42 | 8  | 88  | 106 | 18   |
| 7898 | 2 | 62 | 79 | 127 | 124 | -3   |
| 7900 | 2 | 85 | 57 | 109 | 175 | 66   |
| 7901 | 2 | 98 | 83 | 203 | 160 | -43  |
| 7902 | 2 | 82 | 63 | 104 | 147 | 43   |
| 7903 | 2 | 95 | 30 | 139 | 147 | 8    |
| 7906 | 2 | 91 | 89 | 192 | 239 | 47   |
| 7908 | 2 | 70 | 20 | 239 | 133 | -106 |

|       |   |     |     |     |     |     |
|-------|---|-----|-----|-----|-----|-----|
| 7909  | 2 | 95  | 89  | 241 | 217 | -24 |
| 7916  | 2 | 70  | 18  | 116 | 122 | 6   |
| 7998  | 2 |     |     | 107 | 113 | 6   |
| 9064  | 2 | 76  | 93  |     |     | 0   |
| 24931 | 2 | 48  | 98  |     |     | 0   |
| 8082  | 3 | 77  | 90  | 92  | 121 | 29  |
| 9481  | 3 | 11  | 82  | 76  | 75  | -1  |
| 9482  | 3 | 76  | 85  |     |     | 0   |
| 7736  | 3 | 95  | 81  |     |     | 0   |
| 7987  | 3 | 94  | 81  |     |     | 0   |
| 7984  | 3 | 89  | 87  |     |     | 0   |
| 7597  | 3 | 73  | 79  |     |     | 0   |
| 25689 | 3 | 70  | 79  |     |     | 0   |
| 24140 | 3 | 51  | 82  | 124 | 112 | -12 |
| 8962  | 3 | 95  | 98  | 115 | 88  | -27 |
| 24143 | 3 | 87  | 68  | 83  | 79  | -4  |
| 8065  | 3 | 82  | 69  | 116 | 102 | -14 |
| 7623  | 3 | 47  | 61  | 256 | 248 | -8  |
| 8047  | 3 | 53  | 99  | 140 | 136 | -4  |
| 8048  | 3 | 100 | 99  | 122 | 135 | 13  |
| 9693  | 3 | 94  | 91  | 221 | 229 | 8   |
| 8053  | 3 | 96  | 99  | 164 | 135 | -29 |
| 7562  | 3 | 99  | 99  | 108 | 120 | 12  |
| 8096  | 3 | 85  | 100 | 178 | 175 | -3  |
| 24410 | 3 | 96  | 100 | 169 | 162 | -7  |
| 7570  | 3 | 75  | 98  | 189 | 198 | 9   |
| 8059  | 3 | 71  | 96  | 159 | 160 | 1   |
| 7571  | 3 | 98  | 99  |     |     | 0   |
| 24415 | 3 | 96  | 100 |     |     | 0   |
| 9701  | 3 | 100 | 97  | 185 | 172 | -13 |
| 24941 | 3 | 89  | 100 | 115 | 113 | -2  |
| 8070  | 3 | 90  | 92  | 163 | 178 | 15  |
| 8069  | 3 | 65  | 95  | 74  | 67  | -7  |
| 23668 | 3 | 77  | 99  | 108 | 111 | 3   |

|       |   |     |     |     |     |     |
|-------|---|-----|-----|-----|-----|-----|
| 8075  | 3 | 74  | 77  | 155 | 140 | -15 |
| 8072  | 3 | 50  | 100 | 110 | 107 | -3  |
| 8074  | 3 | 98  | 90  | 152 | 146 | -6  |
| 8100  | 3 | 79  | 94  | 150 | 127 | -23 |
| 8099  | 3 | 95  | 99  | 157 | 145 | -12 |
| 8081  | 3 | 95  | 95  | 200 | 213 | 13  |
| 8080  | 3 | 18  | 95  | 110 | 114 | 4   |
| 2492  | 3 | 76  | 92  | 116 | 129 | 13  |
| 8082  | 3 | 89  | 96  | 119 | 130 | 11  |
| 24952 | 3 | 98  | 98  | 184 | 173 | -11 |
| 8088  | 3 | 67  | 96  | 104 | 127 | 23  |
| 8101  | 3 | 85  | 83  | 145 | 113 | -32 |
| 9700  | 3 | 98  | 96  | 162 | 154 | -8  |
| 8967  | 3 | 82  | 96  | 101 | 82  | -19 |
| 7623  | 3 | 88  | 90  | 319 | 306 | -13 |
| 9629  | 3 | 100 | 100 | 223 | 226 | 3   |
| 24968 | 3 | 97  | 91  | 192 | 197 | 5   |
| 8682  | 3 | 83  | 83  | 96  | 77  | -19 |
| 24990 | 3 | 93  | 68  | 125 | 89  | -36 |
| 9080  | 3 | 93  | 77  | 74  | 80  | 6   |
| 9084  | 3 | 45  | 90  | 116 | 96  | -20 |
| 9090  | 3 | 53  | 69  | 107 | 143 | 36  |
| 25019 | 3 | 97  | 99  | 150 | 162 | 12  |
| 24137 | 3 | 60  | 83  | 103 | 78  | -25 |
| 6962  | 3 | 44  | 59  | 107 | 109 | 2   |
| 7983  | 3 | 89  | 95  | 190 | 175 | -15 |
| 7737  | 3 | 96  | 95  | 109 | 116 | 7   |
| 9207  | 3 | 55  | 92  | 95  | 103 | 8   |
| 8104  | 3 | 53  | 85  | 114 | 88  | -26 |
| 25014 | 3 | 78  | 91  | 119 | 132 | 13  |
| 9486  | 3 | 100 | 99  | 170 | 161 | -9  |
| 24139 | 3 | 43  | 67  | 119 | 79  | -40 |
| 8962  | 3 | 37  | 65  | 73  | 56  | -17 |
| 24915 | 3 | 90  | 93  |     |     | 0   |

|       |   |    |     |     |     |     |
|-------|---|----|-----|-----|-----|-----|
| 25001 | 3 | 96 | 83  | 123 | 144 | 21  |
| 8097  | 3 | 6  | 81  | 117 | 99  | -18 |
| 7562  | 3 | 99 | 95  | 149 | 160 | 11  |
| 8047  | 3 | 22 | 77  | 126 | 88  | -38 |
| 8048  | 3 | 90 | 93  | 107 | 82  | -25 |
| 9693  | 3 | 97 | 94  | 154 | 148 | -6  |
| 7570  | 3 | 86 | 93  | 91  | 98  | 7   |
| 8096  | 3 | 50 | 89  | 89  | 76  | -13 |
| 8073  | 3 | 83 | 92  | 106 | 61  | -45 |
| 24410 | 3 | 89 | 84  | 146 | 97  | -49 |
| 7571  | 3 | 91 | 100 | 182 | 99  | -83 |
| 24392 | 3 | 94 | 92  | 170 | 87  | -83 |
| 8060  | 3 | 69 | 84  | 32  | 78  | 46  |
| 24941 | 3 | 78 | 89  | 152 | 116 | -36 |
| 24915 | 3 | 86 | 95  | 160 | 102 | -58 |
| 8061  | 3 | 80 | 50  | 101 | 59  | -42 |
| 9701  | 3 | 97 | 99  | 149 | 100 | -49 |
| 24413 | 3 | 99 | 98  | 190 | 134 | -56 |
| 8065  | 3 | 77 | 88  | 137 | 90  | -47 |
| 8974  | 3 | 94 | 94  | 170 | 98  | -72 |
| 7929  | 3 | 94 | 94  | 156 | 116 | -40 |
| 24415 | 3 | 81 | 82  | 124 | 91  | -33 |
| 23668 | 3 | 80 | 89  | 107 | 94  | -13 |
| 9355  | 3 | 70 | 82  | 92  | 81  | -11 |
| 8066  | 3 | 76 | 87  | 120 | 95  | -25 |
| 8068  | 3 | 72 | 83  | 56  | 75  | 19  |
| 8070  | 3 | 84 | 90  | 79  | 64  | -15 |
| 8073  | 3 | 91 | 96  | 99  | 58  | -41 |
| 8097  | 3 | 37 | 88  | 136 | 105 | -31 |
| 8074  | 3 | 76 | 91  | 128 | 97  | -31 |

File S2

Sequence Data

Red C is insertion point of P-element from Bloomington stock 11790. Blue letters are where primers were designed to verify presence of insert.

4/8/10 - Primers designed to be used with P-element inverse repeat primer. If insert is there, product should be seen following PCR.

- Gish Forward Primer – gish11790\_f (to be used with Repeat Reverse Primer) - CGT AGC ACG AGG CTG TTT TC (expected size ~516)
- Gish Reverse Primer – gish11790\_r (to be used with Repeat Forward Primer) - CGC AAG CCT ATG GTC TCT AG (expected size ~523)

Gilgamesh gene region sequence near insertion (from Flybase)

ATATGGCCAAAAGTCGAGTAGTTACACCCTCTCTGCCTCTTTGCCCTCTGCCTTTCTTGGTTTTCTCTCTCT  
TATTCTCTTTGGGTCTTTGGCCATCGCCGCCTTGGCTCGTTTTTGCATCGAATAACAAAACCTTGAAAATTTA  
TAAAAATAAACGAAATCACGTACGAAATATTTACTTCGACCTTGC GGCCCCAGAGATTTTTCCAACAATTTA  
TACGGCGCGGTGGCCATGGCAGCTAATTAGCCTAATTTCTGTAATTTCTAAATTTTAATTTGGTACCTTTTA  
GAAGAGAGTAACTTTCAATTTGTGCGACGATGACTTTAAAAGTTTTAAGTTAAAGTCAATAGTAACTCTTACTAA  
ATTAATGAAAATCAATTGAAAAAACAATTTAGTTAGCGCTCTCATCAGTGCTTTTGTGTGACCAG  
CATACGCTATGGCTGGCCTAACATACCAAAGAAATACCGCAGTTTCGTACATTCATTAGTCTATTTACTATT  
TTTATTATCCATACAGAATGAAAAATGTTAAATCGTCGGTAATATGAGTTTTTTATATTTTGTATCAGTTAAC  
ATGATCTTTTCGTCAAAACATTCAAAGCGCTTGAATTAAGACCGATCTTTACGTTTACAATTTTGTATTTCAG  
CTCTTTTACAATTGCTTTAACTTTTCCATTCTTATTTTTTCAGATTGCTTTGATTTCCACGATCGTGAGCATTAAA  
AGTTTAGGCGTGATACTGACCGGTTAAATTTCCCTTAATTGAAATTTAACTACATATTTAAACAGCAACATAGT  
CCCTTTTGCCTAAAATGTCATCAAAAACCTGGGAGGAAAAATATCATAGCAACAATCTGAATGAATTCGGAGAT  
TCAGATCTGTTGTCACAAAAATTGTTGGATAAAATGTGCGAAAGTGTGTTTGTCAAATTTAGCCAAAATT  
ATTTGTTTACATAGTTGTTTCAGCGTAGCACGAGGCTGTTTTCTTAATTCTTAAACAACATAGATACACTCGCC  
TTGGCTAATTTACACCGGAACCTAAAGCCGATTAACAATAGGAAAAATAGTCCACGACAAAATAGCCCGCCTT  
TTGACATATGAACACATAACTAAACTACCACACAGCTACCAAAAACATAAAAATAAATTCGGAAAGTATAGCA  
CCAAAGCTGAAATTTCAAGGAGATGCTGCTCAAATTTCACTATTTGATGTCAAACAACGACGACCCCATAGCA  
ACAACAACAACAACAGCAGAAAGAGAAGGAAAAGGAACAACCTGGAATAACTGTAAGCTAGCGAACAGAGGG  
AGAGAGGCAATCTCTGTACACACACCTGTGCTCCAGCGGGGAAAGAGCAAAAAGAGAGCGACGGATCTCC  
CGTGTGTGTTGTTTCGCATGCGCGACATGCGCGGACGCTAAGTGAGTGTGAGTGAGTGCGCGAATGCGTGT  
GAGTGTGGGCGGTGAGGATAATTCGCTCAATTCGCACGCATCCACAGATCCTGCAGATCCTCCAGTTTGT  
TCGTCAAACAGAGTCAGCATTTCCGGATCAAACCAGTTGCTGTGTCAGCAACATTAACAGCCTCAACGTTGGAA  
AAAAAAAACAAGCAGCAGCGGCAGTCGATAAAAAATCATTATCAAAAATTACGGAAAAGCGATCAAAAATT  
CAAGCGAGATTAGCTAGGCGAAATGCAGCGACGAGAACGGCAAGCAAGGTGAGTTATGATTGTGTAATTGT  
ATATCGATTATCCCCAAATTCATAAAGAGGTAATGGTTCTAAGACTCTTTCAAAAATTAATAATTAATCCCTAC  
CATTTAAGTTGGCATTGCTTTTGGCTACAGTATTGAAACCCATTTATAGTTTTCTATTGTCAATCGAAAATCAA  
GATAAGCGAATCTAGCCCACTGGCTTTATCCCTGCTTTTGAATCTGAATCTTTTGTACGCCCTTAGCTATAC  
CTTCCAACCTCAAGCGGTACTCAAATTTGACTAGAGACCATAGGCTTGCGACTATTTATAATTTGCAATTGA  
TAAGCCGTGCTAAAAACCATTGCCACTATCTACGGAAGCGACGTCTGTTCTATAAATGTTCCATATTCGGT  
ACTACAGTACACTGTTATCAGGCGTAGAAGCGGTTGGATATTTTGTAGCGATAAGATTATGGCTGTGTCCGG  
GAAACGCGTGTGTTGCAAGTTTTAAACCTAACAGTTTTGATTTGGTTGGCTTAGTTAACCAATAGAAGTACTAGCT  
TTTCTTTCACTCATAAAAACTTTTTAAAAATTAACGAATGCAAACTGCGAATTTTTTAAAGAAAATGAGTCTGGT  
TAAAATAATTTTATTTTCGTTTAAACATAAATAAATTTCCATAAAGCTAATTCCTTTTAAATTCCTAGCGAATACT  
GTACATTGTCAAAGTTCAAGCAACAGATTTAGTTGTAGCTGCCTTTTTTGGCGAACGATTTTATTTTGTAGCAA  
AGAGATGTTTCTATTTAACTTGTGTGTTGATTTTATTTTATTTTTCGCAAGTGTGTTTGTGCTTTTGGCTTAT  
GGCGTCTGCTTTTCTCGCCTCTGGCACGCCAGCCAAACTAAGAAGAAGAGCCATGAGAAGGGGGTGAATG  
AAATGGGTTTCCAATGCAATACATAATACCCACATACATATGTGGGTGCGTGATAGATAGCACCGGTC  
TTTCGTGTAGGAGAGCGGGAAACGAAGTGCACACAACCTCACGCACATTATAAATATTTTATAGGCATTTT

**Hop AA Sequence:**

aGTCCTaCGTACAAATaGCCCCGCTTTTGACATATGAACACATAACTAAACTACCACACAGCTCACAAAAACA  
TAAATAAAATTCGgaAAGTATAGCACCAAAGCTGaAATTTCAAGGAGATGCTGCTCAAATiTCATACTTGATGT  
CAAACAACGACGACCCCATAGCAACAACAACAACAACAGCAGAAAAGAGAAGGAAAAGGAACAACCTGGAAT  
AACTGTAAGCTAGCGAACAGAGGGAGAGAGGCAATCTCTGTACACACACCTGTCGTCCAGCGGGGAAAGAG  
CAAAAGAGAGCGACGGATCTCCCGTGTGTGTTGTTTCGCATGCGCGACATGCGCGGACGCTAAGTGAGTGTGA  
GTGAGTGCGCGAATGCGTGTGAGTGTGGGCGGTGAGGATAATTCGCTCAATTCGCACGCATCCCACAGA**T**CCT  
GCAGATCCTCCAGTTTGTTCGTCAAACAGAGTCAGCATTTCGGATCAAACCAGTTGCCTGTCAGCAACATTAA  
CAGCCTCAACGTTGGAAAAAAAAAAAAAACAAGCAGCAgCGGCaGTCGATAAAAAAaTCTTTaTCAAAaTTACGG  
AAAAGCGaTCAAAaTTCAaGCGAGaTTAgcTAGGCgAAaTGCAgCGACgAgAACGGCAAGCAAGGTGAGTTATGA  
TTGTCTAATTGTATATCGATTATCCCCAAATCCATAACGAGGTAATGGTTCTAAgACTCTTTCAAAAATTAAA  
AATTAATCCTACCATTTAAGTTGGCaTTGCTTTTGCTACaGTATTGAAACCCaTTTATAGTTTTCTaTTGTCA

- No sign of p-element. Precise excision



File S3

Seizure Threshold Data

Charlatan

| Genotype               | Threshold |
|------------------------|-----------|
| elavgal4bss1/+;chnRNAi | 5.6       |
| elavgal4bss1/+;chnRNAi | 3.1       |
| elavgal4bss1/+;chnRNAi | 3.1       |
| elavgal4bss1/+;chnRNAi | 2.8       |

Gish

Df ED10639

| Genotype              | Threshold | Control Genotype     | Threshold |
|-----------------------|-----------|----------------------|-----------|
| parabss1/+;;Ed10936/+ | 21        | parabss1/+;;Tm3,Sb/+ | 5.4       |
| parabss1/+;;Ed10936/+ | 21        | parabss1/+;;Tm3,Sb/+ | 5         |
| parabss1/+;;Ed10936/+ | 21        | parabss1/+;;Tm3,Sb/+ | 5         |
| parabss1/+;;Ed10936/+ | 8.2       | parabss1/+;;Tm3,Sb/+ | 5         |
| parabss1/+;;Ed10936/+ | 16        | parabss1/+;;Tm3,Sb/+ | 3.6       |
| parabss1/+;;Ed10936/+ | 10        | parabss1/+;;Tm3,Sb/+ | 21        |
| parabss1/+;;Ed10936/+ | 16        | parabss1/+;;Tm3,Sb/+ | 21        |
| parabss1/+;;Ed10936/+ | 16        | parabss1/+;;Tm3,Sb/+ | 16        |
| parabss1/+;;Ed10936/+ | 48        | parabss1/+;;Tm3,Sb/+ | 21        |
| parabss1/+;;Ed10936/+ | 21        | parabss1/+;;Tm3,Sb/+ | 16        |
| parabss1/+;;Ed10936/+ | 38        | parabss1/+;;Tm3,Sb/+ | 7.5       |
| parabss1/+;;Ed10936/+ | 30        | parabss1/+;;Tm3,Sb/+ | 5.6       |
| parabss1/+;;Ed10936/+ | 21        | parabss1/+;;Tm3,Sb/+ | 6.9       |
| parabss1/+;;Ed10936/+ | 21        | parabss1/+;;Tm3,Sb/+ | 10        |
| parabss1/+;;Ed10936/+ | 21        | parabss1/+;;Tm3,Sb/+ | 5         |

| Genotype     | Threshold | Control Genotype | Threshold |
|--------------|-----------|------------------|-----------|
| w;;Ed10639/+ | 56        | w;;Tm3,Sb/+      | 48        |
| w;;Ed10639/+ | 56        | w;;Tm3,Sb/+      | 48        |
| w;;Ed10639/+ | 56        | w;;Tm3,Sb/+      | 38        |
| w;;Ed10639/+ | 56        | w;;Tm3,Sb/+      | 66        |
| w;;Ed10639/+ | 56        | w;;Tm3,Sb/+      | 48        |
| w;;Ed10639/+ | 42        | w;;Tm3,Sb/+      | 38        |
| w;;Ed10639/+ | 48        | w;;Tm3,Sb/+      | 38        |
| w;;Ed10639/+ | 48        | w;;Tm3,Sb/+      | 38        |
| w;;Ed10639/+ | 48        | w;;Tm3,Sb/+      | 56        |
| w;;Ed10639/+ | 88        | w;;Tm3,Sb/+      | 21        |
| w;;Ed10639/+ | 80        | w;;Tm3,Sb/+      | 21        |
| w;;Ed10639/+ | 56        | w;;Tm3,Sb/+      | 52        |
| w;;Ed10639/+ | 48        | w;;Tm3,Sb/+      | 72        |
| w;;Ed10639/+ | 100       | w;;Tm3,Sb/+      | 61        |
| w;;Ed10639/+ | 38        | w;;Tm3,Sb/+      | 21        |

gish04895

| Genotype                | Threshold | Control Genotype     | Threshold |
|-------------------------|-----------|----------------------|-----------|
| parabss1/+;;gish04895/+ | 10        | parabss1/+;;Tm6,Dr/+ | 16        |
| parabss1/+;;gish04895/+ | 10        | parabss1/+;;Tm6,Dr/+ | 10        |
| parabss1/+;;gish04895/+ | 21        | parabss1/+;;Tm6,Dr/+ | 21        |
| parabss1/+;;gish04895/+ | 10        | parabss1/+;;Tm6,Dr/+ | 6.5       |
| parabss1/+;;gish04895/+ | 10        | parabss1/+;;Tm6,Dr/+ | 6.5       |
| parabss1/+;;gish04895/+ | 8.5       | parabss1/+;;Tm6,Dr/+ | 21        |
| parabss1/+;;gish04895/+ | 48        | parabss1/+;;Tm6,Dr/+ | 7.5       |
| parabss1/+;;gish04895/+ | 16        | parabss1/+;;Tm6,Dr/+ | 8.5       |
| parabss1/+;;gish04895/+ | 8.8       | parabss1/+;;Tm6,Dr/+ | 7.5       |
| parabss1/+;;gish04895/+ | 8.5       | parabss1/+;;Tm6,Dr/+ | 7.5       |
| parabss1/+;;gish04895/+ | 8.5       | parabss1/+;;Tm6,Dr/+ | 5.6       |
| parabss1/+;;gish04895/+ | 8.5       | parabss1/+;;Tm6,Dr/+ | 8.2       |
| parabss1/+;;gish04895/+ | 42        | parabss1/+;;Tm6,Dr/+ | 8.2       |
| parabss1/+;;gish04895/+ | 6.9       | parabss1/+;;Tm6,Dr/+ | 8.2       |
| parabss1/+;;gish04895/+ | 16        | parabss1/+;;Tm6,Dr/+ | 4         |
| parabss1/+;;gish04895/+ | 16        | parabss1/+;;Tm6,Dr/+ | 8.2       |
| parabss1/+;;gish04895/+ | 21        | parabss1/+;;Tm6,Dr/+ | 21        |
| parabss1/+;;gish04895/+ | 8.2       | parabss1/+;;Tm6,Dr/+ | 6.2       |
| parabss1/+;;gish04895/+ | 42        | parabss1/+;;Tm6,Dr/+ | 8.2       |
| parabss1/+;;gish04895/+ | 8.2       | parabss1/+;;Tm6,Dr/+ | 5         |
| parabss1/+;;gish04895/+ | 10        | parabss1/+;;Tm6,Dr/+ | 21        |
| parabss1/+;;gish04895/+ | 30        | parabss1/+;;Tm6,Dr/+ | 8.2       |
| parabss1/+;;gish04895/+ | 7.5       | parabss1/+;;Tm6,Dr/+ | 7.5       |
| parabss1/+;;gish04895/+ | 8.2       | parabss1/+;;Tm6,Dr/+ | 5.4       |
| parabss1/+;;gish04895/+ | 6.5       | parabss1/+;;Tm6,Dr/+ | 7.5       |

| Genotype       | Threshold | Control Genotype | Threshold |
|----------------|-----------|------------------|-----------|
| w;;gish08495/+ | 30        | w;;Tm6,Dr/+      | 72        |
| w;;gish08495/+ | 80        | w;;Tm6,Dr/+      | 80        |
| w;;gish08495/+ | 66        | w;;Tm6,Dr/+      | 38        |
| w;;gish08495/+ | 56        | w;;Tm6,Dr/+      | 30        |
| w;;gish08495/+ | 72        | w;;Tm6,Dr/+      | 48        |
| w;;gish08495/+ | 95        | w;;Tm6,Dr/+      | 38        |
| w;;gish08495/+ | 72        | w;;Tm6,Dr/+      | 21        |
| w;;gish08495/+ | 66        | w;;Tm6,Dr/+      | 38        |
| w;;gish08495/+ | 80        | w;;Tm6,Dr/+      | 38        |
| w;;gish08495/+ | 66        | w;;Tm6,Dr/+      | 48        |
| w;;gish08495/+ | 100       | w;;Tm6,Dr/+      | 30        |
| w;;gish08495/+ | 48        | w;;Tm6,Dr/+      | 21        |
| w;;gish08495/+ | 56        | w;;Tm6,Dr/+      | 38        |
| w;;gish08495/+ | 16        | w;;Tm6,Dr/+      | 66        |
| w;;gish08495/+ | 48        | w;;Tm6,Dr/+      | 80        |

| Genotype                | Threshold | Control Genotype  | Threshold |
|-------------------------|-----------|-------------------|-----------|
| elavbss1/+;;gish rnai/+ | 46.6      | elavbss1/+;;tm6/+ | 8.09      |
| elavbss1/+;;gish rnai/+ | 10.44     | elavbss1/+;;tm6/+ | 5.8       |
| elavbss1/+;;gish rnai/+ | 10.44     | elavbss1/+;;tm6/+ | 6.95      |

|                         |      |                   |      |
|-------------------------|------|-------------------|------|
| elavbss1/+;;gish rnai/+ | 27.3 | elavbss1/+;;tm6/+ | 8.09 |
| elavbss1/+;;gish rnai/+ | 37.7 | elavbss1/+;;tm6/+ | 9.2  |
| elavbss1/+;;gish rnai/+ | 9.2  | elavbss1/+;;tm6/+ | 8.09 |
| elavbss1/+;;gish rnai/+ | 76.2 | elavbss1/+;;tm6/+ | 9.2  |
| elavbss1/+;;gish rnai/+ | 37.7 | elavbss1/+;;tm6/+ | 8.09 |
| elavbss1/+;;gish rnai/+ | 27.3 | elavbss1/+;;tm6/+ | 9.2  |
| elavbss1/+;;gish rnai/+ | 9.91 | elavbss1/+;;tm6/+ | 9.2  |

| Genotype         | Threshold | Control Genotype | Threshold |
|------------------|-----------|------------------|-----------|
| eas;;gish04895/+ | 7.8       | eas;;Tm6,Dr/+    | 5.85      |
| eas;;gish04895/+ | 5.85      | eas;;Tm6,Dr/+    | 3.41      |
| eas;;gish04895/+ | 11.25     | eas;;Tm6,Dr/+    | 8.77      |
| eas;;gish04895/+ | 7.32      | eas;;Tm6,Dr/+    | 5.85      |
| eas;;gish04895/+ | 5.85      | eas;;Tm6,Dr/+    | 7.8       |
| eas;;gish04895/+ | 5.85      | eas;;Tm6,Dr/+    | 3.41      |
| eas;;gish04895/+ | 11.25     | eas;;Tm6,Dr/+    | 5.85      |
| eas;;gish04895/+ | 5.85      | eas;;Tm6,Dr/+    | 5.85      |
| eas;;gish04895/+ | 13        | eas;;Tm6,Dr/+    | 5.85      |
| eas;;gish04895/+ | 11.25     | eas;;Tm6,Dr/+    | 5.22      |

File S4

Bang-Sensitivity Data

**Charlatan**

|                                |       |
|--------------------------------|-------|
| elavgal4c155;chnRNAi/+         | 0%    |
| Df Exel7135/Cyo                | 0%    |
| Recovery Time (s)              |       |
| parabss1;Df Exel7135/+         | 363   |
| parabss1;+/Cyo                 | 264   |
| parabss1;Df BSC346/+           | 89.9  |
| parabss1;Cyo/+                 | 125.4 |
| parabss1;Df BSC651/+           | 268   |
| parabss1;Cyo/+                 | 98.5  |
| elavgal4c155parabss1;chnRNAi/+ | 261.9 |
| elavgal4c155parabss1;+/+       | 105.6 |

**Df Ed10639**

|                          |       |
|--------------------------|-------|
| parabss1/+;;Df Ed10639/+ | 10.6% |
| parabss1/+;;+/Tm3,Sb     | 82.1% |

**Df Exel7329**

|                           |       |
|---------------------------|-------|
| parabss1/+;;Df Exel7329/+ | 11.1% |
| parabss1/+;;+/Tm6B        | 87.4% |

**Df Exel16269**

|                            |     |
|----------------------------|-----|
| parabss1/+;;Df Exel16269/+ | 95% |
| parabss1/+;;+/Tm6B         | 81% |

**Gish**

|                           |       |
|---------------------------|-------|
| parabss1/+;;gish04895/+   | 38.6% |
| parabss1/+;;Tm6, Dr       | 90.5% |
| parabss1/+;;gishKG03891/+ | 71.1% |
| parabss1/+;;Tm3,Sb        | 80.4% |
| parabss1/+;;gishDG16412/+ | 72.7% |
| parabss1/+;;Tm6B          | 87.7% |
| parabss1/+;;gishe01759/+  | 91.3% |

|                                      |        |
|--------------------------------------|--------|
| parabss1/+;;Tm3,Sb                   | 96%    |
| parabss1/+;;gish04895excision        | 63.4%  |
| parabss1/+;;Tm6B                     | 61.95% |
| elavgal4c155parabss1/+;;gishRNAi/+   | 14.0%  |
| elavgal4c155parabss1/+;;+/Balancer   | 57.0%  |
| parabss1;;Df Ed10639/+               | 100%   |
| parabss1;;+/Tm3,Sb                   | 100%   |
| parabss1;;gish04895/+                | 100%   |
| parabss1;;+/Tm6,Dr                   | 100%   |
| elavgal4c155parabss1;;gishRNAi/+     | 100%   |
| elavgal4c155parabss1;;+/Balancer     | 100%   |
| eas;;gish04895/+                     | 100%   |
| eas;;+/Tm6,Dr                        | 100%   |
| <b>Other</b>                         |        |
| parabss1/+;;bor <sup>c05496</sup> /+ | 78.5%  |
| parabss1/+;;+/Tm6B                   | 86.2%  |
| parabss1/+;;tara1/+                  | 87.1%  |
| parabss1/+;;+/Tm3,Sb                 | 78.9%  |
| elavgal4c155parabss1;;arrRNAi/+      | 64.8%  |
| elavgal4c155parabss1;;Tm6B/+         | 92.0%  |
| The following are                    |        |
| elavgal4c155parabss1;wgRNAi/+        | 30.3%  |
| elavgal4c155parabss1;+/tft           | 52.2%  |
| elavgal4c155parabss1;panRNAi/+       | 37.0%  |
| elavgal4c155parabss1;+/tft           | 39.3%  |
