# Supplementary material for: Drosophila as a Model for Intractable Epilepsy: Gilgamesh Suppresses Seizures in parabss1 Heterozygote Flies
Source: PubMed Central journal article supplement (PMC3737179; doi:10.1534/g3.113.006130), 2013-08-01
Supplement: supp_g3.113.006130_FileS2.pdf [file supp_g3.113.006130_FileS2.pdf]

File S2

Sequence Data

Red C is insertion point of P-element from Bloomington stock 11790. Blue letters are where primers were designed to verify presence of insert.

4/8/10 - Primers designed to be used with P-element inverse repeat primer. If insert is there, product should be seen following PCR.

- Gish Forward Primer – gish11790\_f (to be used with Repeat Reverse Primer) - CGT AGC ACG AGG CTG TTT TC (expected size ~516)
- Gish Reverse Primer – gish11790\_r (to be used with Repeat Forward Primer) - CGC AAG CCT ATG GTC TCT AG (expected size ~523)

Gilgamesh gene region sequence near insertion (from Flybase)

ATATGGCCAAAAGTCGAGTAGTTACACCCTCTCTGCCTCTTTGCCCTCTGCCTTTCTTGGTTTTCTCTCTCT  
TATTCTCTTTGGGTCTTTGGCCATCGCCGCCTTGGCTCGTTTTTGCATCGAATAACAAAACCTTGAAAATTTA  
TAAAAATAAACGAAATCACGTACGAAATATTTACTTCGACCTTGC GGCCCAGAGATTTTTCCAACAATTTA  
TACGGCGCGGTGGCCATGGCAGCTAATTAGCCTAATTTCTGTAATTTCTAAATTTTAATTTGGTACCTTTTA  
GAAGAGAGTAACCTTTCATTTGTGCGACGATGACTTTAAAAGTTTTAAGTTAAAGTCAATAGTAACCTTACTAA  
ATTAATGAAAATCAATTGAAAAAACAATTTAGTTAGCGCTCTCATCAGTGCTTTTGTGTGACCAG  
CATACGCTATGGCTGGCCTAACATACCAAAGAAATACCGCAGTTTCGTACATTCATTAGTCTATTTACTATT  
TTTATTATCCATACAGAATGAAAAATGTTAAATCGTCGGTAATATGAGTTTTTTTATTTTTGTATCAGTTAAC  
ATGATCTTTTCGTCAAAACATTCAAAGCGCTTGAATTAAGACCGATCTTTACGTTTACAATTTTGTATTTCAG  
CTCTTTTACAATTGCTTTAACTTTTCCATTCTTATTTTTCAGATTGCTTTGATTTCCACGATCGTGAGCATTAAA  
AGTTTAGGCGTGATACTGACCGGTTAAATTTCCCTTAATTGAAATTTAACTACATATTTAAACAGCAACATAGT  
CCCTTTTGCCTAAAATGTCATCAAAAACCTGGGAGGAAAAATATCATAGCAACAATCTGAATGAATTCGGAGAT  
TCAGATCTGTTGTCAAAAAATTGTTGGATAAAATGTGCGAAAGTGTGTTTGTCAAATTTAGCCAAAATT  
ATTTGTTTACATAGTTGTTTCAGCGTAGCACGAGGCTGTTTTCTTAATTCTTAAACAACATAGATACACTCGCC  
TTGGCTAATTTACACCGGAACCTAAAGCCGATTAACAATAGGAAAAATAGTCCACGACAAAATAGCCCGCCTT  
TTGACATATGAACACATAACTAAACTACCACACAGCTACCAAAAACATAAAAATAAATTCGGAAAGTATAGCA  
CCAAAGCTGAAATTTCAAGGAGATGCTGCTCAAATTTTACACTTTGATGTCAAACAACGACGACCCCATAGCA  
ACAACAACAACAACAGCAGAAAGAGAAGGAAAAGGAACAACCTGGAATAACTGTAAGCTAGCGAACAGAGGG  
AGAGAGGCAATCTCTGTACACACACCTGTGCTCCAGCGGGGAAAGAGCAAAAAGAGAGCGACGGATCTCC  
CGTGTGTGTTGTTTCGCATGCGCGACATGCGCGGACGCTAAGTGAGTGTGAGTGAGTGCGCGAATGCGTGT  
GAGTGTGGGCGGTGAGGATAATTCGCTCAATTCGCACGCATCCACAGATCCTGCAGATCCTCCAGTTTGT  
TCGTCAAACAGAGTCAGCATTTCCGGATCAAACCAGTTGCTGTGTCAGCAACATTAACAGCCTCAACGTTGGAA  
AAAAAAAACAAAAGCAGCAGCGGCAGTCGATAAAAAAATCATTATCAAAAATTACGGAAAAGCGATCAAAAAT  
CAAGCGAGATTAGCTAGGCGAAATGCAGCGACGAGAACGGCAAGCAAGGTGAGTTATGATTGTGTAATTGT  
ATATCGATTATCCCCAAATTCATAAAGAGGTAATGGTTCTAAGACTCTTTCAAAAATTAATAAATTAATCCCTAC  
CATTTAAGTTGGCATTGCTTTTGGCTACAGTATTGAAACCCATTTATAGTTTTCTATTGTCAATCGAAAATCAA  
GATAAGCGAATCTAGCCCACTGGCTTTATCCCTGCTTTTGAATCTGAATCTTTTGTACGCCCTTAGCTATAC  
CTTCCAACCTCAAGCGGTACTCAAATTTGACTAGAGACCATAGGCTTGCGACTATTTATAATTTTGCATTGA  
TAAGCCGTGCTAAAAACCATTGCCACTATCTACGGAAGCGACGTCTGTTCTATAAATGTTCCATATTCGGT  
ACTACAGTACACTGTTATCAGGCGTAGAAGCGGTTGGATATTTTGTAGCGATAAGATTATGGCTGTGTCCGG  
GAAACGCGTGTGTTGCAAGTTTTAAAACCTAACAGTTTTGATTTGGTTGGCTTAGTTAACCAATAGAAGTACTAGCT  
TTTCTTTCACTCATAAAAACTTTTTAAAATATTAACGAATGCAAACTGCGAATTTTTTAAAGAAAATGAGTCTGGT  
TAAAATAATTTTATTTTCGTTTAAACATAAATAAATTTCCATAAAGCTAATTCCTTTTAAATTCCTAGCGAATACT  
GTACATTGTCAAAGTTCAAGCAACAGATTTAGTTGTAGCTGCCTTTTTTGGCGAACGATTTTATTTTTAGCAA  
AGAGATGTTTCTATTTAACTTGTGTGTTGATTTTATTTTATTTTCGCAAGTGTGTTTGTGCTTTTGGCTTAT  
GGCGTCTGCTTTTCTCGCCTCTGGCAGCCAGCCAAACTAAGAAGAAGAGCCATGAGAAGGGGGTGAATG  
AAATGGGTTTCCAATGCAATACATAATACCCACATACATATGTGGGTGCGTGATAGATAGCACCGGTC  
TTTCGTGTAGGAGAGCGGGAAACGAAGTGCACACAACCTCACGCACATTATAAATATTTTATAGGCATTTT

**Hop AA Sequence:**

aGTCCTaCGTACAAATaGCCCCGCTTTTGACATATGAACACATAACTAAACTACCACACAGCTCACAAAAACA  
TAAATAAAATTCGgaAAGTATAGCACCAAAGCTGaAATTTCAAGGAGATGCTGCTCAAATiTCATACTTGATGT  
CAAACAACGACGACCCCATAGCAACAACAACAACAACAGCAGAAAAGAGAAGGAAAAGGAACAACCTGGAAT  
AACTGTAAGCTAGCGAACAGAGGGAGAGAGGCAATCTCTGTACACACACCTGTCGTCCAGCGGGGAAAGAG  
CAAAAGAGAGCGACGGATCTCCCGTGTGTGTTGTTTCGCATGCGCGACATGCGCGGACGCTAAGTGAGTGTGA  
GTGAGTGCGCGAATGCGTGTGAGTGTGGGCGGTGAGGATAATTCGCTCAATTCGCACGCATCCCACAGA **T** CCT  
GCAGATCCTCCAGTTTGTTCGTCAAACAGAGTCAGCATTTCGGATCAAACCAGTTGCCTGTCAGCAACATTAA  
CAGCCTCAACGTTGGAAAAAAAAAAAAAACAAGCAGCAgCGGCaGTCGATAAAAAAaTCTTTaTCAAAaTTACGG  
AAAAGCGaTCAAAaTTCAaGCGAGaTTAgcTAGGCgAAaTGCAgCGACgAgAACGGCAAGCAAGGTGAGTTATGA  
TTGTCTAATTGTATATCGATTATCCCCAAATCCATAACGAGGTAATGGTTCTAAgACTCTTTCAAAAATTAAA  
AATTAATCCTACCATTTAAGTTGGCaTTGCTTTTGCTACaGTATTGAAACCCaTTTATAGTTTTCTaTTGTCA

- No sign of p-element. Precise excision
