# Supplementary material for: Drosophila as a Model for Intractable Epilepsy: Gilgamesh Suppresses Seizures in parabss1 Heterozygote Flies
Source: PubMed Central journal article supplement (PMC3737179; doi:10.1534/g3.113.006130), 2013-08-01
Supplement: supp_g3.113.006130_FileS3.pdf [file supp_g3.113.006130_FileS3.pdf]

File S3

Seizure Threshold Data

Charlatan

| Genotype               | Threshold |
|------------------------|-----------|
| elavgal4bss1/+;chnRNAi | 5.6       |
| elavgal4bss1/+;chnRNAi | 3.1       |
| elavgal4bss1/+;chnRNAi | 3.1       |
| elavgal4bss1/+;chnRNAi | 2.8       |

Gish

Df ED10639

| Genotype              | Threshold | Control Genotype     | Threshold |
|-----------------------|-----------|----------------------|-----------|
| parabss1/+;;Ed10936/+ | 21        | parabss1/+;;Tm3,Sb/+ | 5.4       |
| parabss1/+;;Ed10936/+ | 21        | parabss1/+;;Tm3,Sb/+ | 5         |
| parabss1/+;;Ed10936/+ | 21        | parabss1/+;;Tm3,Sb/+ | 5         |
| parabss1/+;;Ed10936/+ | 8.2       | parabss1/+;;Tm3,Sb/+ | 5         |
| parabss1/+;;Ed10936/+ | 16        | parabss1/+;;Tm3,Sb/+ | 3.6       |
| parabss1/+;;Ed10936/+ | 10        | parabss1/+;;Tm3,Sb/+ | 21        |
| parabss1/+;;Ed10936/+ | 16        | parabss1/+;;Tm3,Sb/+ | 21        |
| parabss1/+;;Ed10936/+ | 16        | parabss1/+;;Tm3,Sb/+ | 16        |
| parabss1/+;;Ed10936/+ | 48        | parabss1/+;;Tm3,Sb/+ | 21        |
| parabss1/+;;Ed10936/+ | 21        | parabss1/+;;Tm3,Sb/+ | 16        |
| parabss1/+;;Ed10936/+ | 38        | parabss1/+;;Tm3,Sb/+ | 7.5       |
| parabss1/+;;Ed10936/+ | 30        | parabss1/+;;Tm3,Sb/+ | 5.6       |
| parabss1/+;;Ed10936/+ | 21        | parabss1/+;;Tm3,Sb/+ | 6.9       |
| parabss1/+;;Ed10936/+ | 21        | parabss1/+;;Tm3,Sb/+ | 10        |
| parabss1/+;;Ed10936/+ | 21        | parabss1/+;;Tm3,Sb/+ | 5         |

| Genotype     | Threshold | Control Genotype | Threshold |
|--------------|-----------|------------------|-----------|
| w;;Ed10639/+ | 56        | w;;Tm3,Sb/+      | 48        |
| w;;Ed10639/+ | 56        | w;;Tm3,Sb/+      | 48        |
| w;;Ed10639/+ | 56        | w;;Tm3,Sb/+      | 38        |
| w;;Ed10639/+ | 56        | w;;Tm3,Sb/+      | 66        |
| w;;Ed10639/+ | 56        | w;;Tm3,Sb/+      | 48        |
| w;;Ed10639/+ | 42        | w;;Tm3,Sb/+      | 38        |
| w;;Ed10639/+ | 48        | w;;Tm3,Sb/+      | 38        |
| w;;Ed10639/+ | 48        | w;;Tm3,Sb/+      | 38        |
| w;;Ed10639/+ | 48        | w;;Tm3,Sb/+      | 56        |
| w;;Ed10639/+ | 88        | w;;Tm3,Sb/+      | 21        |
| w;;Ed10639/+ | 80        | w;;Tm3,Sb/+      | 21        |
| w;;Ed10639/+ | 56        | w;;Tm3,Sb/+      | 52        |
| w;;Ed10639/+ | 48        | w;;Tm3,Sb/+      | 72        |
| w;;Ed10639/+ | 100       | w;;Tm3,Sb/+      | 61        |
| w;;Ed10639/+ | 38        | w;;Tm3,Sb/+      | 21        |

gish04895

| Genotype                | Threshold | Control Genotype     | Threshold |
|-------------------------|-----------|----------------------|-----------|
| parabss1/+;;gish04895/+ | 10        | parabss1/+;;Tm6,Dr/+ | 16        |
| parabss1/+;;gish04895/+ | 10        | parabss1/+;;Tm6,Dr/+ | 10        |
| parabss1/+;;gish04895/+ | 21        | parabss1/+;;Tm6,Dr/+ | 21        |
| parabss1/+;;gish04895/+ | 10        | parabss1/+;;Tm6,Dr/+ | 6.5       |
| parabss1/+;;gish04895/+ | 10        | parabss1/+;;Tm6,Dr/+ | 6.5       |
| parabss1/+;;gish04895/+ | 8.5       | parabss1/+;;Tm6,Dr/+ | 21        |
| parabss1/+;;gish04895/+ | 48        | parabss1/+;;Tm6,Dr/+ | 7.5       |
| parabss1/+;;gish04895/+ | 16        | parabss1/+;;Tm6,Dr/+ | 8.5       |
| parabss1/+;;gish04895/+ | 8.8       | parabss1/+;;Tm6,Dr/+ | 7.5       |
| parabss1/+;;gish04895/+ | 8.5       | parabss1/+;;Tm6,Dr/+ | 7.5       |
| parabss1/+;;gish04895/+ | 8.5       | parabss1/+;;Tm6,Dr/+ | 5.6       |
| parabss1/+;;gish04895/+ | 8.5       | parabss1/+;;Tm6,Dr/+ | 8.2       |
| parabss1/+;;gish04895/+ | 42        | parabss1/+;;Tm6,Dr/+ | 8.2       |
| parabss1/+;;gish04895/+ | 6.9       | parabss1/+;;Tm6,Dr/+ | 8.2       |
| parabss1/+;;gish04895/+ | 16        | parabss1/+;;Tm6,Dr/+ | 4         |
| parabss1/+;;gish04895/+ | 16        | parabss1/+;;Tm6,Dr/+ | 8.2       |
| parabss1/+;;gish04895/+ | 21        | parabss1/+;;Tm6,Dr/+ | 21        |
| parabss1/+;;gish04895/+ | 8.2       | parabss1/+;;Tm6,Dr/+ | 6.2       |
| parabss1/+;;gish04895/+ | 42        | parabss1/+;;Tm6,Dr/+ | 8.2       |
| parabss1/+;;gish04895/+ | 8.2       | parabss1/+;;Tm6,Dr/+ | 5         |
| parabss1/+;;gish04895/+ | 10        | parabss1/+;;Tm6,Dr/+ | 21        |
| parabss1/+;;gish04895/+ | 30        | parabss1/+;;Tm6,Dr/+ | 8.2       |
| parabss1/+;;gish04895/+ | 7.5       | parabss1/+;;Tm6,Dr/+ | 7.5       |
| parabss1/+;;gish04895/+ | 8.2       | parabss1/+;;Tm6,Dr/+ | 5.4       |
| parabss1/+;;gish04895/+ | 6.5       | parabss1/+;;Tm6,Dr/+ | 7.5       |

| Genotype       | Threshold | Control Genotype | Threshold |
|----------------|-----------|------------------|-----------|
| w;;gish08495/+ | 30        | w;;Tm6,Dr/+      | 72        |
| w;;gish08495/+ | 80        | w;;Tm6,Dr/+      | 80        |
| w;;gish08495/+ | 66        | w;;Tm6,Dr/+      | 38        |
| w;;gish08495/+ | 56        | w;;Tm6,Dr/+      | 30        |
| w;;gish08495/+ | 72        | w;;Tm6,Dr/+      | 48        |
| w;;gish08495/+ | 95        | w;;Tm6,Dr/+      | 38        |
| w;;gish08495/+ | 72        | w;;Tm6,Dr/+      | 21        |
| w;;gish08495/+ | 66        | w;;Tm6,Dr/+      | 38        |
| w;;gish08495/+ | 80        | w;;Tm6,Dr/+      | 38        |
| w;;gish08495/+ | 66        | w;;Tm6,Dr/+      | 48        |
| w;;gish08495/+ | 100       | w;;Tm6,Dr/+      | 30        |
| w;;gish08495/+ | 48        | w;;Tm6,Dr/+      | 21        |
| w;;gish08495/+ | 56        | w;;Tm6,Dr/+      | 38        |
| w;;gish08495/+ | 16        | w;;Tm6,Dr/+      | 66        |
| w;;gish08495/+ | 48        | w;;Tm6,Dr/+      | 80        |

| Genotype                | Threshold | Control Genotype  | Threshold |
|-------------------------|-----------|-------------------|-----------|
| elavbss1/+;;gish rnai/+ | 46.6      | elavbss1/+;;tm6/+ | 8.09      |
| elavbss1/+;;gish rnai/+ | 10.44     | elavbss1/+;;tm6/+ | 5.8       |
| elavbss1/+;;gish rnai/+ | 10.44     | elavbss1/+;;tm6/+ | 6.95      |

|                         |      |                   |      |
|-------------------------|------|-------------------|------|
| elavbss1/+;;gish rnai/+ | 27.3 | elavbss1/+;;tm6/+ | 8.09 |
| elavbss1/+;;gish rnai/+ | 37.7 | elavbss1/+;;tm6/+ | 9.2  |
| elavbss1/+;;gish rnai/+ | 9.2  | elavbss1/+;;tm6/+ | 8.09 |
| elavbss1/+;;gish rnai/+ | 76.2 | elavbss1/+;;tm6/+ | 9.2  |
| elavbss1/+;;gish rnai/+ | 37.7 | elavbss1/+;;tm6/+ | 8.09 |
| elavbss1/+;;gish rnai/+ | 27.3 | elavbss1/+;;tm6/+ | 9.2  |
| elavbss1/+;;gish rnai/+ | 9.91 | elavbss1/+;;tm6/+ | 9.2  |

| Genotype         | Threshold | Control Genotype | Threshold |
|------------------|-----------|------------------|-----------|
| eas;;gish04895/+ | 7.8       | eas;;Tm6,Dr/+    | 5.85      |
| eas;;gish04895/+ | 5.85      | eas;;Tm6,Dr/+    | 3.41      |
| eas;;gish04895/+ | 11.25     | eas;;Tm6,Dr/+    | 8.77      |
| eas;;gish04895/+ | 7.32      | eas;;Tm6,Dr/+    | 5.85      |
| eas;;gish04895/+ | 5.85      | eas;;Tm6,Dr/+    | 7.8       |
| eas;;gish04895/+ | 5.85      | eas;;Tm6,Dr/+    | 3.41      |
| eas;;gish04895/+ | 11.25     | eas;;Tm6,Dr/+    | 5.85      |
| eas;;gish04895/+ | 5.85      | eas;;Tm6,Dr/+    | 5.85      |
| eas;;gish04895/+ | 13        | eas;;Tm6,Dr/+    | 5.85      |
| eas;;gish04895/+ | 11.25     | eas;;Tm6,Dr/+    | 5.22      |
