# Supplementary material for: Drosophila as a Model for Intractable Epilepsy: Gilgamesh Suppresses Seizures in parabss1 Heterozygote Flies
Source: PubMed Central journal article supplement (PMC3737179; doi:10.1534/g3.113.006130), 2013-08-01
Supplement: supp_g3.113.006130_FileS4.pdf [file supp_g3.113.006130_FileS4.pdf]

File S4

Bang-Sensitivity Data

**Charlatan**

|                                |       |
|--------------------------------|-------|
| elavgal4c155;chnRNAi/+         | 0%    |
| Df Exel7135/Cyo                | 0%    |
| Recovery Time (s)              |       |
| parabss1;Df Exel7135/+         | 363   |
| parabss1;+/Cyo                 | 264   |
| parabss1;Df BSC346/+           | 89.9  |
| parabss1;Cyo/+                 | 125.4 |
| parabss1;Df BSC651/+           | 268   |
| parabss1;Cyo/+                 | 98.5  |
| elavgal4c155parabss1;chnRNAi/+ | 261.9 |
| elavgal4c155parabss1;+/+       | 105.6 |

**Df Ed10639**

|                          |       |
|--------------------------|-------|
| parabss1/+;;Df Ed10639/+ | 10.6% |
| parabss1/+;;+/Tm3,Sb     | 82.1% |

**Df Exel7329**

|                           |       |
|---------------------------|-------|
| parabss1/+;;Df Exel7329/+ | 11.1% |
| parabss1/+;;+/Tm6B        | 87.4% |

**Df Exel16269**

|                            |     |
|----------------------------|-----|
| parabss1/+;;Df Exel16269/+ | 95% |
| parabss1/+;;+/Tm6B         | 81% |

**Gish**

|                           |       |
|---------------------------|-------|
| parabss1/+;;gish04895/+   | 38.6% |
| parabss1/+;;Tm6, Dr       | 90.5% |
| parabss1/+;;gishKG03891/+ | 71.1% |
| parabss1/+;;Tm3,Sb        | 80.4% |
| parabss1/+;;gishDG16412/+ | 72.7% |
| parabss1/+;;Tm6B          | 87.7% |
| parabss1/+;;gishe01759/+  | 91.3% |

|                                      |        |
|--------------------------------------|--------|
| parabss1/+;;Tm3,Sb                   | 96%    |
| parabss1/+;;gish04895excision        | 63.4%  |
| parabss1/+;;Tm6B                     | 61.95% |
| elavgal4c155parabss1/+;;gishRNAi/+   | 14.0%  |
| elavgal4c155parabss1/+;;+/Balancer   | 57.0%  |
| parabss1;;Df Ed10639/+               | 100%   |
| parabss1;;+/Tm3,Sb                   | 100%   |
| parabss1;;gish04895/+                | 100%   |
| parabss1;;+/Tm6,Dr                   | 100%   |
| elavgal4c155parabss1;;gishRNAi/+     | 100%   |
| elavgal4c155parabss1;;+/Balancer     | 100%   |
| eas;;gish04895/+                     | 100%   |
| eas;;+/Tm6,Dr                        | 100%   |
| <b>Other</b>                         |        |
| parabss1/+;;bor <sup>c05496</sup> /+ | 78.5%  |
| parabss1/+;;+/Tm6B                   | 86.2%  |
| parabss1/+;;tara1/+                  | 87.1%  |
| parabss1/+;;+/Tm3,Sb                 | 78.9%  |
| elavgal4c155parabss1;;arrRNAi/+      | 64.8%  |
| elavgal4c155parabss1;;Tm6B/+         | 92.0%  |
| The following are                    |        |
| elavgal4c155parabss1;wgRNAi/+        | 30.3%  |
| elavgal4c155parabss1;+/tft           | 52.2%  |
| elavgal4c155parabss1;panRNAi/+       | 37.0%  |
| elavgal4c155parabss1;+/tft           | 39.3%  |
